# Supplementary material for: Early-Life Antibiotic Exposure Associated With Varicella Occurrence and Breakthrough Infections: Evidence From Nationwide Pre-Vaccination and Post-Vaccination Cohorts
Source: Frontiers journal article supplement (doi:10.3389/fimmu.2022.848835), 2022-03-31
Supplement: Data_Sheet_1.PDF [file Data_Sheet_1.PDF]

## Supplementary Material

**Title:** Early-life antibiotic exposure associated with varicella occurrence and breakthrough infections: evidence from nationwide pre-vaccination and post-vaccination cohorts

**Authors:**

Teng-Li Lin, MD, Yi-Hsuan Fan, MD, Yi-Ling Chang, MS, Hsiu J. Ho, PhD, Li-Lin Liang, PhD, Yi-Ju Chen, MD, PhD, Chun-Ying Wu, MD, MPH, PhD

Supplemental Figure 1. Cumulative incidences of varicella in patients in the pre-vaccination era and the vaccination era.

Supplemental Table 1. Codes for varicella and comorbidities in our analysis

Supplemental Table 2. The commonly used systemic antibiotics, H2RAs, PPIs, laxatives, corticosteroids and DMARDs in Taiwan

Supplemental Table 3. Demographic characteristics and outcomes of study subjects in the pre-vaccination and vaccination eras

Supplemental Table 4. Baseline demographic characteristics and outcomes of the study subjects in the antibiotic and reference cohorts in the pre-vaccination and vaccination eras

Supplemental Table 5. Antibiotic exposure in the matched study subjects among antibiotic cohorts in the pre-vaccination era and the vaccination eras

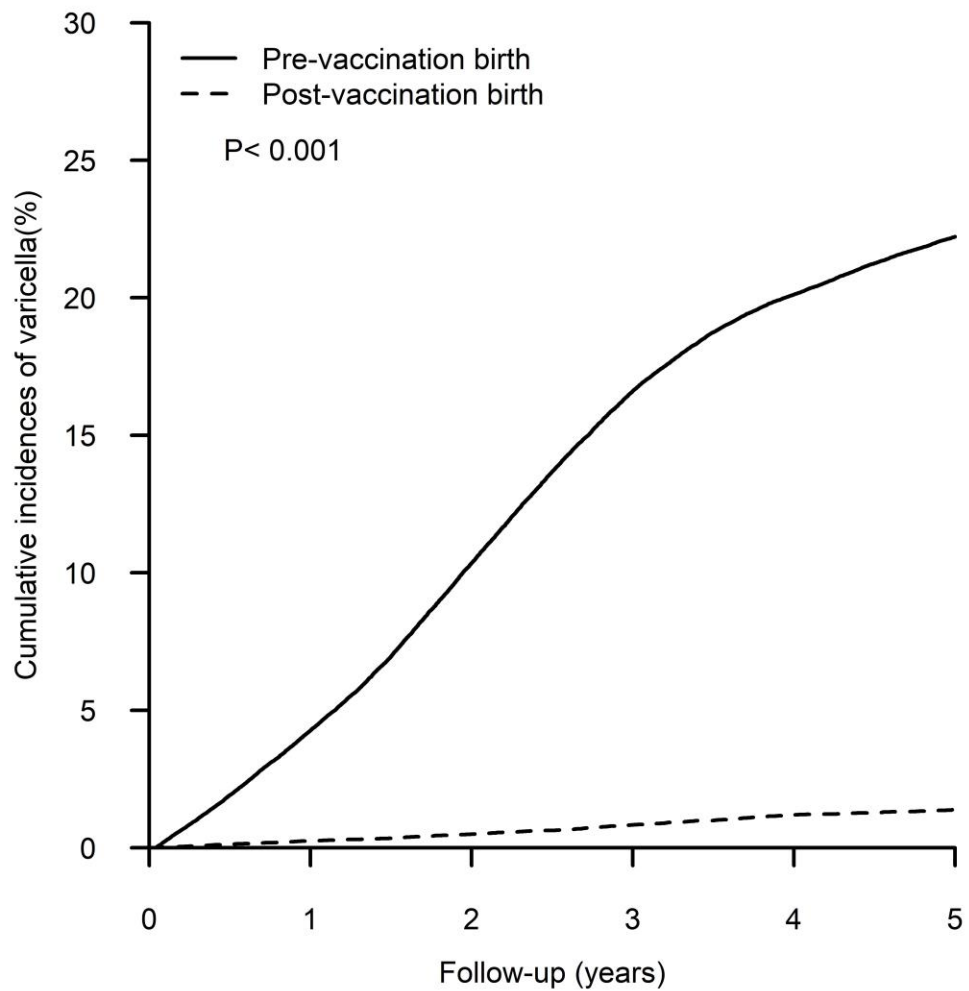

Number at risk

|                        |       |       |       |       |       |       |
|------------------------|-------|-------|-------|-------|-------|-------|
| Pre-vaccination birth  | 81596 | 78084 | 73094 | 67956 | 65069 | 63321 |
| Post-vaccination birth | 47533 | 47323 | 39092 | 30676 | 22159 | 13378 |

Supplemental Figure 1. Cumulative incidences of varicella in patients in the pre-vaccination era and the vaccination era. The differences between patients in these two era were determined by log-rank test.

Supplemental Table 1. Codes for varicella and comorbidities in our analysis

|                                     | ICD-9-CM code                   |
|-------------------------------------|---------------------------------|
| Varicella                           | 052                             |
| Comorbidities other than infections |                                 |
| Malignancy                          | 140-208                         |
| Immunodeficiency disorders          | 042, 279.0-279.3                |
| White blood cell disorders          | 284, 288                        |
| Transplantation                     | V42                             |
| Chemotherapy or immunotherapy       | V58.1                           |
| Congenital anomalies of heart       | 745, 746                        |
| Kawasaki disease                    | 446.1                           |
| Non-bacterial gastroenteritis       | 558.9                           |
| Constipation                        | 564.00, 564.09                  |
| Intussusception                     | 560                             |
| Appendicitis                        | 540-5432                        |
| Febrile convulsion                  | 780.31, 780.31                  |
| Epilepsy and recurrent seizures     | 345                             |
| Tourette syndrome/Tics              | 307.2                           |
| Infections                          |                                 |
| All infections                      | 001-139 (not include 042)       |
| Chronic sinusitis                   | 473                             |
| Acute otitis media                  | 381                             |
| Acute upper respiratory infections  | 460-466                         |
| Acute bronchitis/bronchiolitis      | 490, 491                        |
| Pneumonia                           | 480-486                         |
| Urinary tract infection             | 590, 595, 597                   |
| Meningitis                          | 320.7, 320.9, 321.1, 321.2, 322 |
| Sepsis                              | 771.81, 995.91, 995.92          |
| Cellulitis/Abscess                  | 681, 682                        |
| Impetigo                            | 684                             |

Abbreviations: ICD-9-CM, International Classification of Diseases, Revision 9, Clinical Modification.

Supplemental Table 2. The commonly used systemic antibiotics, H2RAs, PPIs, laxatives, corticosteroids and DMARDs in Taiwan

| Medication type | Drug                                                                                                                                                                                                                                                                                                                 |
|-----------------|----------------------------------------------------------------------------------------------------------------------------------------------------------------------------------------------------------------------------------------------------------------------------------------------------------------------|
| Antibiotics     | Penicillin; Cephalosporin; Tetracycline; Macrolides; Aminoglycosides; Polypeptides; Quinolones; Sulfonamides; Anti-urinary infectives; Antifungals Antitrichomonal agents and anticandidal agents; Antitubercular agents; Combined regimens                                                                          |
| H2RAs           | Cimetidine, Famotidine, Nizatidine, Ranitidine, Roxatidine                                                                                                                                                                                                                                                           |
| PPIs            | Omeprazole; Lansoprazole; Esomeprazole; Pantoprazole; Dexlansoprazole; Rabeprazole                                                                                                                                                                                                                                   |
| Laxatives       | Sterculia and Frangula; Psyllium husk; Methylcellulose; Polycarbophil; Magnesium oxide; Magnesium hydroxide; Polyethylene glycol-electrolyte solution; Monobasic sodium phosphate; Lactulose; Sorbitol; Sodium phosphate; Bisacodyl; Sennoside A+B; Castor Oil; Mineral oil; Glycerin; Dioctyl sodium sulfosuccinate |
| Corticosteroids | Betamethasone; Cortisone Acetate; Dexamethasone; Fludrocortisone Acetate; Hydrocortisone; Methylprednisolone; Prednisolone                                                                                                                                                                                           |
| DMARDs          | Methotrexate; Cyclosporine; Azathioprine; Acitretin; Leflunomide; Hydroxychloroquine; Mycophenolate; Auranofin; Cyclophosphamide; Gold sodium thiomalate; D-penicillamine; Sulfasalazine                                                                                                                             |

Abbreviations: H2RAs, histamine type-2 receptor antagonists; PPIs, proton pump inhibitors; DMARDs, disease-modifying antirheumatic drugs.

Supplemental Table 3. Demographic characteristics and outcomes of study subjects in the pre-vaccination and vaccination eras

|                                                    | Pre-vaccination era<br>(N=81,596) | Vaccination era<br>(N=47,533) | P-value |
|----------------------------------------------------|-----------------------------------|-------------------------------|---------|
| Age, years                                         |                                   |                               |         |
| Mean±SD                                            | 3.0±0.0                           | 3.0±0.0                       | NA      |
| Median (IQR)                                       | 3.0 (3.0-3.0)                     | 3.0 (3.0-3.0)                 | NA      |
| Gender, N (%)                                      |                                   |                               | 0.910   |
| Female                                             | 38,953 (47.7%)                    | 22,708 (47.8%)                |         |
| Male                                               | 42,643 (52.3%)                    | 24,825 (52.2%)                |         |
| Follow-up, years                                   |                                   |                               |         |
| Mean±SD                                            | 4.4±1.3                           | 3.6±1.3                       | <.001   |
| Median (IQR)                                       | 5.0 (5.0-5.0)                     | 3.8 (2.4-5.0)                 | <.001   |
| Hospital visits, N                                 |                                   |                               |         |
| Mean±SD                                            | 93.5±63.1                         | 86.4±58.5                     | <.001   |
| Median (IQR)                                       | 83.0 (48.0-125.0)                 | 75.0 (44.0-116.0)             | <.001   |
| Medication exposure, N (%)                         |                                   |                               |         |
| Antibiotics <sup>a</sup>                           | 69,430 (85.1%)                    | 22,209 (46.7%)                | <.001   |
| H <sub>2</sub> RAs <sup>a</sup>                    | 1,651 (2.0%)                      | 617 (1.3%)                    | <.001   |
| PPIs <sup>a</sup>                                  | 10 (0.0%)                         | 32 (0.1%)                     | <.001   |
| Laxatives <sup>a</sup>                             | 12,662 (15.5%)                    | 5,511 (11.6%)                 | <.001   |
| Corticosteroids <sup>b</sup>                       | 313 (0.4%)                        | 153 (0.3%)                    | 0.083   |
| DMARDs <sup>b</sup>                                | 5 (0.0%)                          | 5 (0.0%)                      | 0.591   |
| Early-life infectious diseases, <sup>c</sup> N (%) |                                   |                               |         |
| All infections <sup>d</sup>                        | 58,023 (71.1%)                    | 38,832 (81.7%)                | <.001   |
| Acute sinusitis                                    | 43,115 (52.8%)                    | 33,387 (70.2%)                | <.001   |
| Chronic sinusitis                                  | 3,343 (4.1%)                      | 890 (1.9%)                    | <.001   |
| Acute otitis media                                 | 6,070 (7.4%)                      | 4,067 (8.6%)                  | <.001   |
| Acute upper respiratory infections                 | 79,540 (97.5%)                    | 46,968 (98.8%)                | <.001   |
| Acute bronchitis/bronchiolitis                     | 64,708 (79.3%)                    | 41,336 (87.0%)                | <.001   |
| Pneumonia                                          | 21,274 (26.1%)                    | 16,804 (35.4%)                | <.001   |
| Urinary tract infection                            | 1,694 (2.1%)                      | 1,174 (2.5%)                  | <.001   |
| Meningitis                                         | 556 (0.7%)                        | 134 (0.3%)                    | <.001   |
| Sepsis                                             | 2,276 (2.8%)                      | 757 (1.6%)                    | <.001   |
| Cellulitis/abscess                                 | 6,001 (7.4%)                      | 5,746 (12.1%)                 | <.001   |
| Impetigo                                           | 3,288 (4.0%)                      | 1,432 (3.0%)                  | <.001   |
| Comorbidities, <sup>e</sup> N (%)                  |                                   |                               |         |

|                               |                |                |       |
|-------------------------------|----------------|----------------|-------|
| Congenital anomalies of heart | 1,511 (1.9%)   | 790 (1.7%)     | 0.014 |
| Kawasaki disease              | 224 (0.3%)     | 167 (0.4%)     | 0.018 |
| Non-bacterial gastroenteritis | 49,905 (61.2%) | 31,276 (65.8%) | <.001 |
| Constipation                  | 18,492 (22.7%) | 11,362 (23.9%) | <.001 |
| Intussusception               | 4,185 (5.1%)   | 1,674 (3.5%)   | <.001 |
| Appendicitis                  | 470 (0.6%)     | 129 (0.3%)     | <.001 |
| Febrile convulsion            | 295 (0.4%)     | 450 (0.9%)     | <.001 |
| Epilepsy                      | 804 (1.0%)     | 314 (0.7%)     | <.001 |
| Tourette syndrome             | 378 (0.5%)     | 353 (0.7%)     | <.001 |
| Allergic diseases, N (%)      |                |                |       |
| Varicella, N (%)              | 18,133 (22.2%) | 482 (1.0%)     | <.001 |
| Age at varicella onset, years | 73 (25.1%)     | 236 (20.3%)    | 0.086 |
| Mean±SD                       | 5.2±1.2        | 5.2±1.3        | 0.582 |
| Median (IQR)                  | 5.1 (4.3-6.0)  | 5.1 (4.0-6.2)  | 0.650 |
| Hospitalization for varicella | 105 (0.1%)     | 13 (0.0%)      | <.001 |

Abbreviations: N, number; SD, standard deviation; IQR, interquartile range; NA, not available; H<sub>2</sub>RAs, histamine type-2 receptor antagonists; PPIs, proton pump inhibitors; DMARDs, disease-modifying antirheumatic drugs.

<sup>a</sup>Exposure to antibiotics, H<sub>2</sub>RAs, PPIs, and laxatives refers to the use of any of these drugs for at least 7 days within the first 2 years of life..

<sup>b</sup>Exposure to immunomodulatory drugs refers to the use of corticosteroids or DMARDs for at least 30 days after the index date.

<sup>c</sup>Early-life infectious diseases refer to infections with diagnostic code recorded in the database at least once before the index date.

<sup>d</sup>All infections include infectious diseases with codes 001-039 but 042 in the International Classification of Diseases, Ninth Revision [ICD-9]

<sup>e</sup>Comorbidities refer to comorbidities with diagnostic code recorded in the database at least once after the index date.

Supplemental Table 4. Baseline demographic characteristics and outcomes of the study subjects in the antibiotic and reference cohorts in the pre-vaccination and vaccination eras

|                                                                            | Pre-vaccination era             |                               |         | Vaccination era                 |                                |         |
|----------------------------------------------------------------------------|---------------------------------|-------------------------------|---------|---------------------------------|--------------------------------|---------|
|                                                                            | Antibiotic cohort<br>(N=69,430) | Reference cohort<br>(N=4,975) | P-value | Antibiotic cohort<br>(N=22,209) | Reference cohort<br>(N=14,096) | P-value |
| Age, years                                                                 |                                 |                               |         |                                 |                                |         |
| Mean±SD                                                                    | 3.0±0.0                         | 3.0±0.0                       | NA      | 3.0±0.0                         | 3.0±0.0                        | NA      |
| Median (IQR)                                                               | 3.0 (3.0-3.0)                   | 3.0 (3.0-3.0)                 | NA      | 3.0 (3.0-3.0)                   | 3.0 (3.0-3.0)                  | NA      |
| Gender, N (%)                                                              |                                 |                               | <.001   |                                 |                                | <.001   |
| Female                                                                     | 32,487 (46.8%)                  | 2,655 (53.4%)                 |         | 9,974 (44.9%)                   | 7,231 (51.3%)                  |         |
| Male                                                                       | 36,943 (53.2%)                  | 2,320 (46.6%)                 |         | 12,235 (55.1%)                  | 6,865 (48.7%)                  |         |
| Follow-up, years                                                           |                                 |                               |         |                                 |                                |         |
| Mean±SD                                                                    | 4.4±1.3                         | 4.6±1.1                       | <.001   | 3.6±1.3                         | 3.5±1.3                        | <.001   |
| Median (IQR)                                                               | 5.0 (5.0-5.0)                   | 5.0 (5.0-5.0)                 | <.001   | 3.9 (2.4-5.0)                   | 3.7 (2.4-5.0)                  | <.001   |
| Hospital visits, N                                                         |                                 |                               |         |                                 |                                |         |
| Mean±SD                                                                    | 95.6±63.0                       | 65.1±56.0                     | <.001   | 94.3±60.4                       | 74.1±53.2                      | <.001   |
| Median (IQR)                                                               | 85.0 (50.0-127.0)               | 53.0 (23.0-94.0)              | <.001   | 83.0 (51.0-125.0)               | 64.0 (35.0-101.0)              | <.001   |
| Antibiotic exposure, days                                                  |                                 |                               |         |                                 |                                |         |
| Mean±SD                                                                    | 46.7±37.8                       | NA                            | NA      | 25.3±26.9                       | NA                             | NA      |
| Median (IQR)                                                               | 36.0 (20.0-62.0)                | NA                            | NA      | 17.0 (11.0~30.0)                | NA                             | NA      |
| Non-antibiotic microbiota-altering medication exposure, <sup>a</sup> N (%) | 13,299 (19.2%)                  | 270 (5.4%)                    | <.001   | 3,773 (17.0%)                   | 1,131 (8.0%)                   | <.001   |
| Histamine type-2 receptor antagonists                                      | 1,585 (2.3%)                    | 16 (0.3%)                     | <.001   | 445 (2.0%)                      | 84 (0.6%)                      | <.001   |
| Proton pump inhibitors                                                     | 9 (0.0%)                        | NA                            | 0.892   | 27 (0.1%)                       | 5 (0.0%)                       | 0.012   |
| Laxatives                                                                  | 11,768 (16.9%)                  | 251 (5.0%)                    | <.001   | 3,365 (15.2%)                   | 1,036 (7.3%)                   | <.001   |
| Immunomodulatory drugs, <sup>b</sup> N (%)                                 |                                 |                               |         |                                 |                                |         |

|                                                    |                |               |       |                 |                |       |
|----------------------------------------------------|----------------|---------------|-------|-----------------|----------------|-------|
| Corticosteroids                                    | 278 (0.4%)     | 13 (0.3%)     | 0.161 | 106 (0.5%)      | 27 (0.2%)      | <.001 |
| DMARDs                                             | 5 (0.0%)       | NA            | >.999 | 4 (0.0%)        | NA             | 0.280 |
| Early-life infectious diseases, <sup>c</sup> N (%) |                |               |       |                 |                |       |
| All infections <sup>d</sup>                        | 51,342 (73.9%) | 2,148 (43.2%) | <.001 | 19,955 (89.9%)  | 9,662 (68.5%)  | <.001 |
| Chronic sinusitis                                  | 3,197 (4.6%)   | 49 (1.0%)     | <.001 | 692 (3.1%)      | 92 (0.7%)      | <.001 |
| Acute otitis media                                 | 5,702 (8.2%)   | 88 (1.8%)     | <.001 | 2,757 (12.4%)   | 564 (4.0%)     | <.001 |
| Acute upper respiratory infections                 | 68,713 (99.0%) | 3,847 (77.3%) | <.001 | 22,198 (100.0%) | 13,558 (96.2%) | <.001 |
| Acute bronchitis/bronchiolitis                     | 57,240 (82.4%) | 2,447 (49.2%) | <.001 | 20,872 (94.0%)  | 10,634 (75.4%) | <.001 |
| Pneumonia                                          | 19,847 (28.6%) | 415 (8.3%)    | <.001 | 10,905 (49.1%)  | 2,680 (19.0%)  | <.001 |
| Urinary tract infections                           | 1,572 (2.3%)   | 32 (0.6%)     | <.001 | 796 (3.6%)      | 148 (1.0%)     | <.001 |
| Meningitis                                         | 528 (0.8%)     | 7 (0.1%)      | <.001 | 108 (0.5%)      | 8 (0.1%)       | <.001 |
| Sepsis                                             | 2,115 (3.0%)   | 48 (1.0%)     | <.001 | 579 (2.6%)      | 67 (0.5%)      | <.001 |
| Cellulitis/abscess                                 | 5,396 (7.8%)   | 163 (3.3%)    | <.001 | 3,478 (15.7%)   | 1,061 (7.5%)   | <.001 |
| Impetigo                                           | 2,971 (4.3%)   | 95 (1.9%)     | <.001 | 895 (4.0%)      | 251 (1.8%)     | <.001 |
| Comorbidities, <sup>e</sup> N (%)                  |                |               |       |                 |                |       |
| Congenital anomalies of heart                      | 1,369 (2.0%)   | 60 (1.2%)     | <.001 | 476 (2.1%)      | 158 (1.1%)     | <.001 |
| Kawasaki disease                                   | 198 (0.3%)     | 12 (0.2%)     | 0.670 | 117 (0.5%)      | 20 (0.1%)      | <.001 |
| Non-bacterial gastroenteritis                      | 43,189 (62.2%) | 2,457 (49.4%) | <.001 | 15,276 (68.8%)  | 8,669 (61.5%)  | <.001 |
| Constipation                                       | 16,095 (23.2%) | 886 (17.8%)   | <.001 | 5,818 (26.2%)   | 2,917 (20.7%)  | <.001 |
| Intussusception                                    | 3,681 (5.3%)   | 177 (3.6%)    | <.001 | 871 (3.9%)      | 420 (3.0%)     | <.001 |
| Appendicitis                                       | 417 (0.6%)     | 23 (0.5%)     | 0.257 | 72 (0.3%)       | 37 (0.3%)      | 0.343 |
| Febrile convulsion                                 | 247 (0.4%)     | 19 (0.4%)     | 0.861 | 247 (1.1%)      | 118 (0.8%)     | 0.012 |
| Epilepsy                                           | 37 (0.8%)      | 34 (0.8%)     | 0.812 | 187 (0.8%)      | 72 (0.5%)      | <.001 |
| Tourette syndrome                                  | 333 (0.5%)     | 19 (0.4%)     | 0.388 | 183 (0.8%)      | 92 (0.7%)      | 0.076 |
| Outcomes                                           |                |               |       |                 |                |       |
| Varicella                                          | 15,901 (22.9%) | 780 (15.7%)   | <.001 | 250 (1.1%)      | 120 (0.9%)     | 0.013 |



|                               |               |               |       |               |               |       |
|-------------------------------|---------------|---------------|-------|---------------|---------------|-------|
| Age at varicella onset, years |               |               |       |               |               |       |
| Mean±SD                       | 5.2±1.2       | 5.3±1.2       | 0.071 | 5.1±1.3       | 5.4±1.3       | 0.054 |
| Median (IQR)                  | 5.1 (4.2-6.0) | 5.2 (4.3-6.1) | 0.050 | 5.1 (3.8-6.1) | 5.3 (4.6-6.2) | 0.065 |
| Hospitalization for varicella | 97 (0.1%)     | 3 (0.1%)      | 0.202 | 7 (0.0%)      | 3 (0.0%)      | 0.804 |

Abbreviations: N, number; SD, standard deviation; IQR, interquartile range; NA, not available; DMARDs, disease-modifying antirheumatic drugs.

<sup>a</sup>Non-antibiotic microbiota-altering medication exposure refers to the use of histamine type-2 receptor antagonists, proton pump inhibitors, or laxatives for at least 7 days within the first 2 years of life. For each type of medication in the following 3 rows, administration was for at least 7 days within the first 2 years of life.

<sup>b</sup>Immunomodulatory drug exposure refers to the use of corticosteroids or DMARDs for at least 30 days after the index date.

<sup>c</sup>Early-life infectious diseases refer to infections with diagnostic code recorded in the database at least once before the index date.

<sup>d</sup>All infections include infectious diseases with codes 001-039 but 042 in the International Classification of Diseases, Ninth Revision [ICD-9].

<sup>e</sup>Comorbidities refer to comorbidities with diagnostic code recorded in the database at least once after the index date.

Supplemental Table 5. Antibiotic exposure in the matched study subjects among antibiotic cohorts in the pre-vaccination era and the vaccination eras

|                                         | Unvaccinated Antibiotic cohort<br>(N=69,430) | Vaccinated Antibiotic cohort<br>(N=9,531) |
|-----------------------------------------|----------------------------------------------|-------------------------------------------|
| All types of antibiotics                | 4,426 (100.0%)                               | 9,531 (100.0%)                            |
| Penicillins                             | 2,636 (59.6%)                                | 5,826 (61.1%)                             |
| Cephalosporins                          | 1,478 (33.4%)                                | 1,464 (15.4%)                             |
| Tetracycline                            | 316 (7.1%)                                   | 49 (0.5%)                                 |
| Macrolides                              | 1,416 (32.0%)                                | 817 (8.6%)                                |
| Aminoglycosides                         | 252 (5.7%)                                   | 753 (7.9%)                                |
| Polypeptides                            | 2 (0.0%)                                     | 17 (0.2%)                                 |
| Quinolones                              | 148 (3.3%)                                   | 92 (1.0%)                                 |
| Sulfonamides                            | 1,004 (22.7%)                                | 536 (5.6%)                                |
| Anti-urinary infectives                 | 257 (5.8%)                                   | 157 (1.6%)                                |
| Others                                  | 132 (3.0%)                                   | 162 (1.7%)                                |
| Antitubercular agents                   | 28 (0.6%)                                    | 40 (0.4%)                                 |
| Combined regimens                       | 17 (0.4%)                                    | 29 (0.3%)                                 |
| Antitrichomonal/<br>anticandidal agents | 558 (12.6%)                                  | 550 (5.8%)                                |
| Antifungals                             | 145 (3.3%)                                   | 711 (7.5%)                                |

Abbreviations: N, number.
